# Supplementary material for: Reduction of [Co(iii)–EDTA]−complex by a novel process using phototrophic granules: a step towards sustainable bioremediation
Source: Royal Society of Chemistry journal article supplement (doi:10.1039/c6ra01160h), 2016-01-01
Supplement: c6ra01160h1.pdf [file c6ra01160h1.pdf]

**Supplementary information**

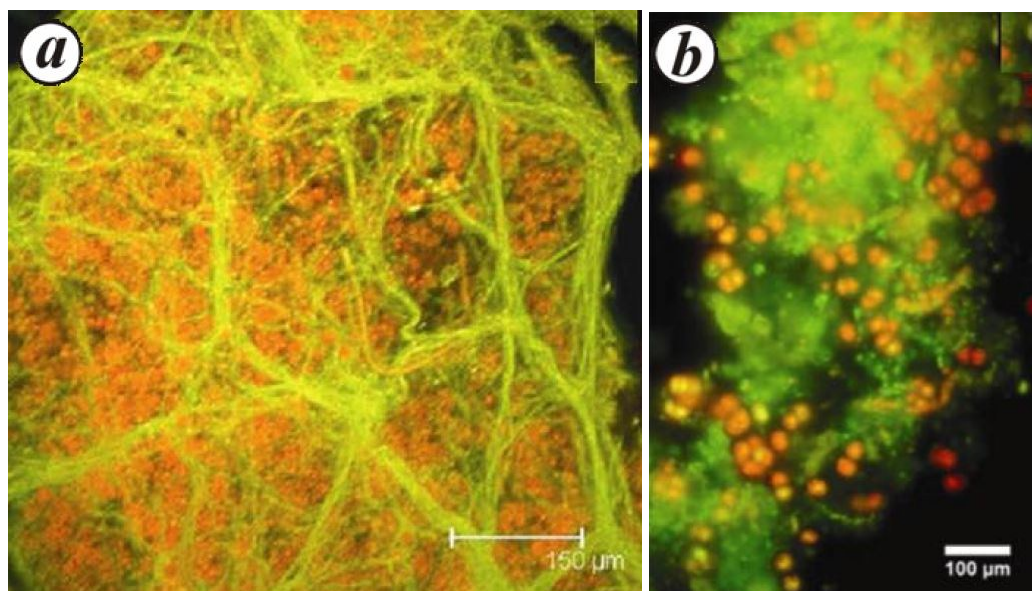

**Supplementary Fig 1(a).** Autofluorescence image of photogranules showing filamentous cyanobacteria and microalgae as seen under confocal microscope. **(b)** Epifluorescence photomicrographs of photogranules stained with acridine orange showing heterotrophic bacteria (green) and cyanobacteria (orange-red). (Reproduced from Kumar and Venugopalan, 2015).<sup>19</sup>

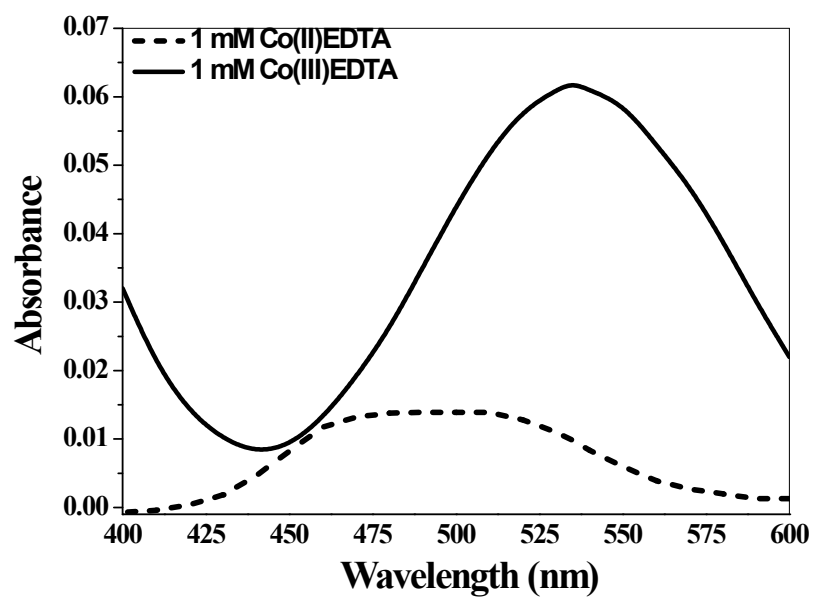

**Supplementary Fig 2.** Absorption spectrum of  $[\text{Co(II)EDTA}]^{2-}$  and  $[\text{Co(III)EDTA}]^{-}$  in the visible range (reproduced from Paraneeiswaran et al., 2015).<sup>21</sup>

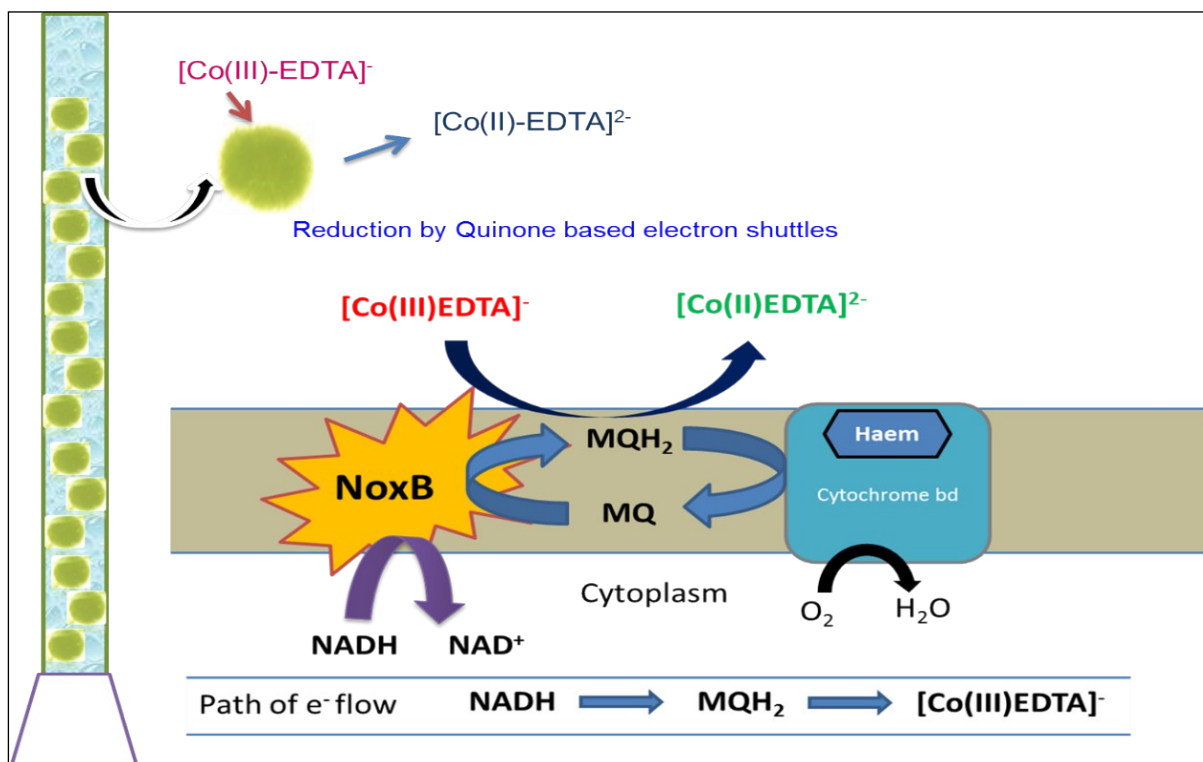

**Supplementary Fig 3.** Schematic illustration to explain the hypothesis of the role of quinone electron shuttle in  $[\text{Co(III)-EDTA}]^-$  reduction by phototrophic granules [adapted from Abicht et al. (2013)<sup>42</sup>].
